# Supplementary material
Source: publisher figshare collection journal article supplement (https://gsajournals.figshare.com/ndownloader/files/21214962)
Supplement: Supplementary file 1 [file 21214962]

Table S3. SNPs in F34 GBS set with HWE p values close to 1.0�10-6 cutoff threshold. These SNPs are removed from QTL summary tables.,,,,,,,,,,
,,,,,,,,,,
CHR,SNP,BP,P,Pheno,A1,A2,GENO,O(HET),E(HET),P
1,chr1.82465404,82465404,9.36E-07,"Locomotor test day 3, total distance travelled in 30min",A,C,0/120/308,0.2804,0.2411,8.21E-05
1,chr1.82465411,82465411,3.93E-06,Routine CBC cell hemoglobin concentration mean,G,A,0/102/326,0.2383,0.2099,0.001903
1,chr1.82465413,82465413,1.88E-06,Routine WBC differential lymphocyte percentage,G,T,0/132/296,0.3084,0.2609,8.89E-06
1,chr1.82465413,82465413,7.46E-07,Routine WBC differential lymphocyte number,G,T,0/132/297,0.3084,0.2609,8.89E-06
1,chr1.82465413,82465413,4.60E-06,Retic parameters cell hemoglobin concentration mean,G,T,0/132/298,0.3084,0.2609,8.89E-06
1,chr1.82465413,82465413,2.73E-10,Routine CBC mean corpuscular hemoglobin concentration,G,T,0/132/299,0.3084,0.2609,8.89E-06
1,chr1.82465413,82465413,5.72E-07,Kidney microalbumin level,G,T,0/132/300,0.3084,0.2609,8.89E-06
2,chr2.157396497,157396497,2.17E-06,Routine CBC mean corpuscular hemoglobin concentration,G,T,0/132/301,0.3084,0.2609,8.89E-06
2,chr2.157396497,157396497,2.17E-06,"Locomotor test day 3, total distance travelled in 30min",G,T,1/145/282,0.3388,0.2845,9.91E-06
5,chr5.120553162,120553162,1.81E-08,Routine WBC differential lymphocyte percentage,C,A,0/142/286,0.3318,0.2767,1.68E-06
5,chr5.120553162,120553162,1.28E-07,Routine WBC differential lymphocyte number,C,A,0/142/287,0.3318,0.2767,1.68E-06
5,chr5.120553162,120553162,4.71E-10,Kidney microalbumin level,C,A,0/142/288,0.3318,0.2767,1.68E-06
5,chr5.120553162,120553162,3.59E-12,"Locomotor test day 3, total distance travelled in 30min",C,A,0/142/289,0.3318,0.2767,1.68E-06
8,chr8.95048447,95048447,1.60E-08,Routine CBC mean platelet volume,G,A,23/97/308,0.2266,0.2783,0.0003584
8,chr8.95048447,95048447,3.11E-06,Routine CBC mean corpuscular volume,G,A,23/97/309,0.2266,0.2783,0.0003584
9,chr9.83981261,83981261,7.98E-06,Kidney creatinine level,T,C,0/96/332,0.2243,0.1991,0.005451
12,chr12.109354257,109354257,9.14E-08,"Locomotor test day 3, total distance travelled in 30min",G,A,34/122/272,0.285,0.3454,0.0006637
